# Supplementary material for: Conservation of a Neutralization Epitope of Human T-cell Leukemia Virus Type 1 (HTLV-1) among Currently Endemic Clinical Isolates in Okinawa, Japan
Source: MDPI journal article supplement (doi:10.3390/pathogens9020082), 2020-01-27
Supplement: s1 [file s1]

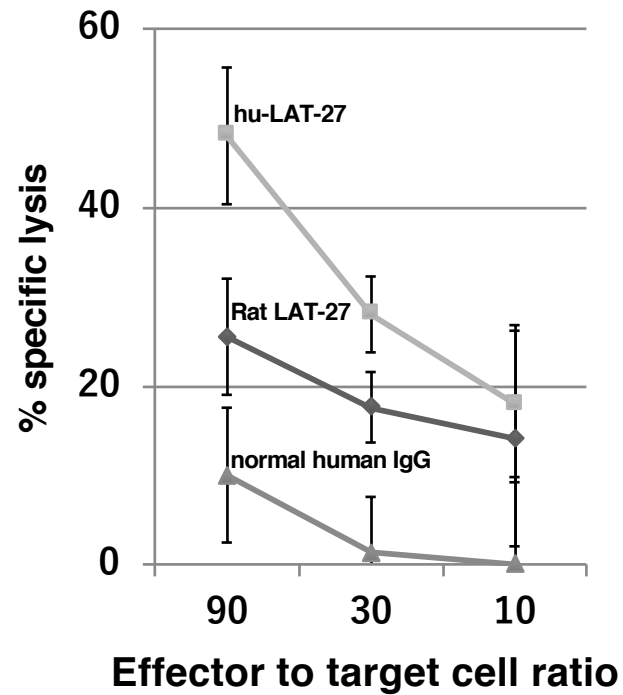

**Supplemental Figure 1. ADCC mediated by hu-LAT-27 mAb.**

<sup>51</sup>Cr-labeled HTLV-1-infected target cells were co-cultivated with normal human PBMCs at different effector to target ratios in the presence of 5  $\mu$ g/mL antibody for 24 h, and the percentage of specific lysis was calculated as previously reported (Reference 22 in the main text).
